# Supplementary material
Source: PubMed Central journal article supplement (PMC6736745)
Supplement: NIHMS1043841-supplement-Supp_data.pdf [file NIHMS1043841-supplement-Supp_data.pdf]

**Supplemental Figure 1.** Patient selection diagram using the SEER database from 2004-2015, applying the defined inclusion and exclusion criteria. DCIS: ductal carcinoma in situ. DCISM: DCIS with microinvasion. IDC: invasive ductal carcinoma.

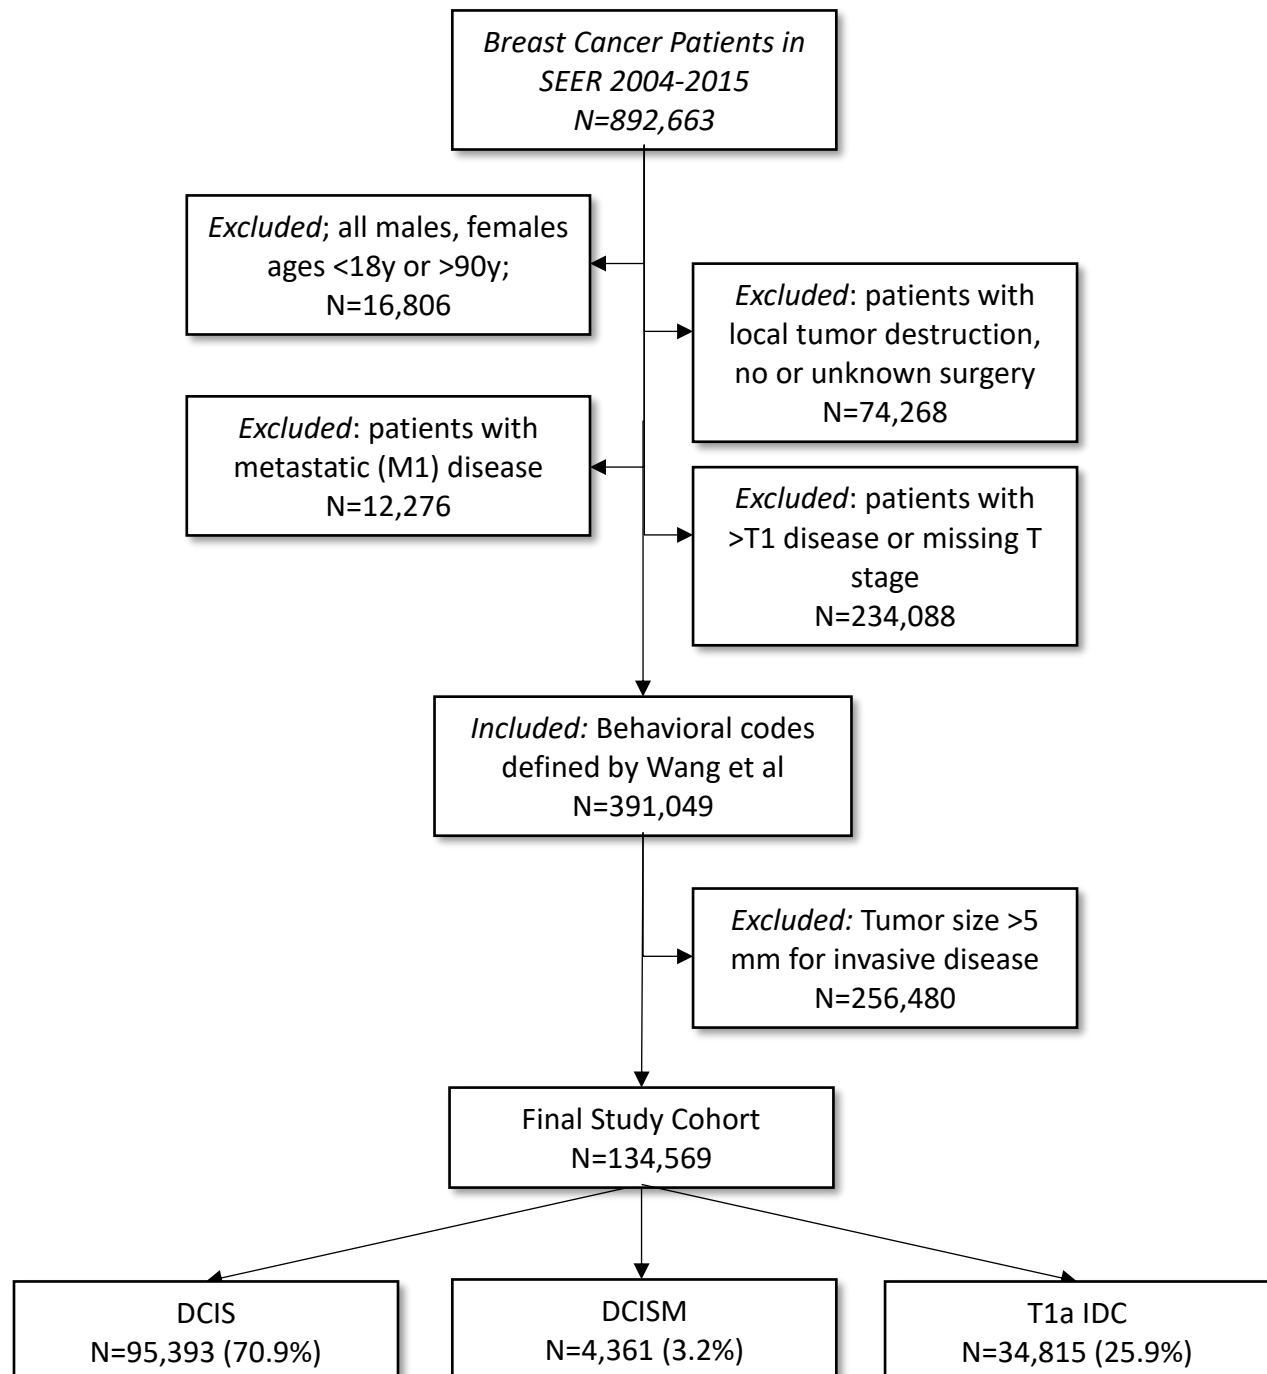

**Supplemental Figure 2.** Unadjusted survival for select women with breast cancer in the SEER database from 2004-2015, stratified by diagnosis and subdivided by HR status. (A) HR-positive cancer-specific survival; (B) HR-positive overall survival; (C) HR-negative cancer-specific survival; (D) HR-negative overall survival. HR: hormone receptor. DCIS: ductal carcinoma in situ. DCISM: DCIS with microinvasion. IDC: invasive ductal carcinoma.

(2A)

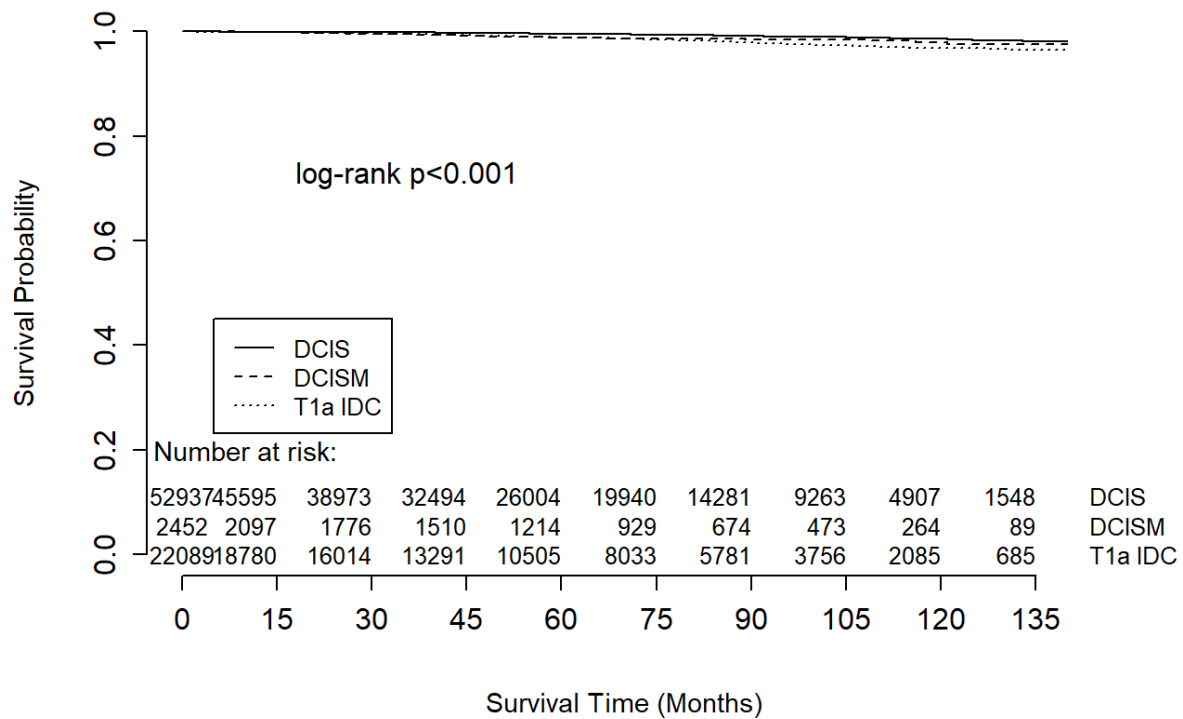

|         | Total | Breast Cancer-Specific Deaths | 5-year Survival (95% CI) | 10-year Survival (95% CI) |
|---------|-------|-------------------------------|--------------------------|---------------------------|
| DCIS    | 52937 | 301                           | 1 (1, 1)                 | 0.99 (0.98, 0.99)         |
| DCISM   | 2452  | 26                            | 0.99 (0.98, 0.99)        | 0.98 (0.97, 0.99)         |
| T1a IDC | 22089 | 291                           | 0.99 (0.99, 0.99)        | 0.97 (0.96, 0.97)         |
| Total   | 77478 | 618                           | 0.99 (0.99, 0.99)        | 0.98 (0.98, 0.98)         |

(2B)

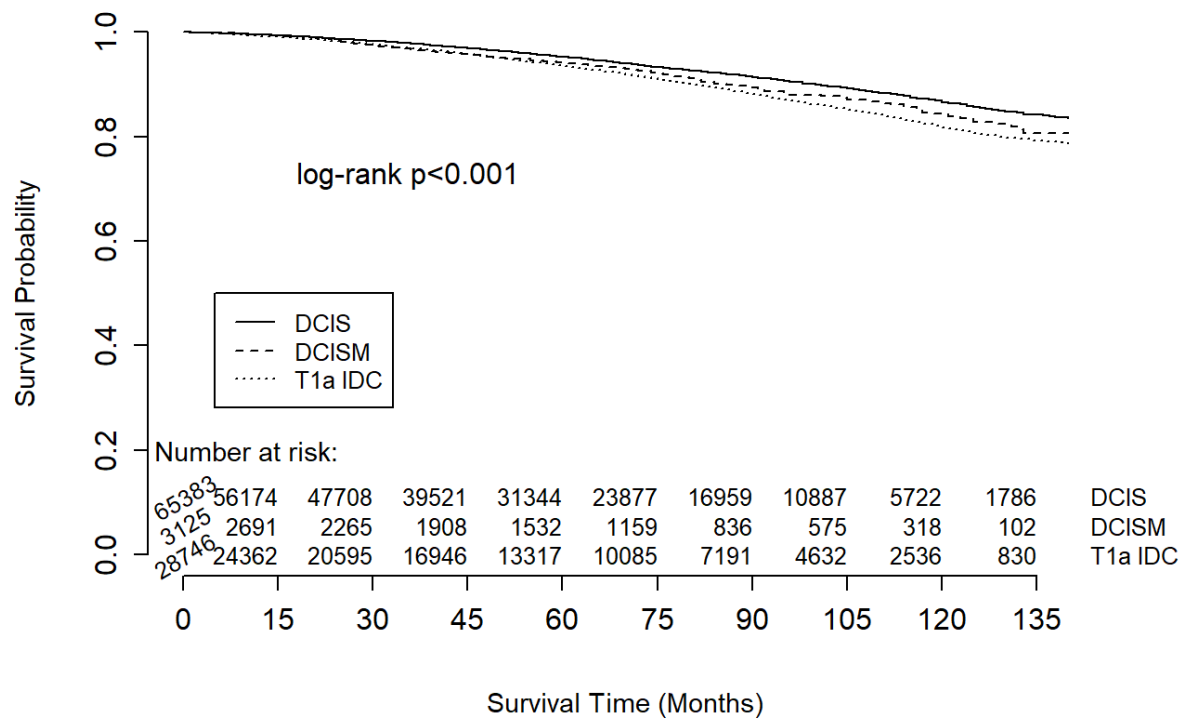

|         | Total | All-Cause Deaths | 5-year Survival (95% CI) | 10-year Survival (95% CI) |
|---------|-------|------------------|--------------------------|---------------------------|
| DCIS    | 65383 | 3818             | 0.95 (0.95, 0.95)        | 0.87 (0.86, 0.87)         |
| DCISM   | 3125  | 230              | 0.94 (0.93, 0.95)        | 0.84 (0.82, 0.87)         |
| T1a IDC | 28746 | 2264             | 0.93 (0.93, 0.94)        | 0.82 (0.81, 0.83)         |
| Total   | 97254 | 6312             | 0.95 (0.94, 0.95)        | 0.85 (0.85, 0.86)         |

(2C)

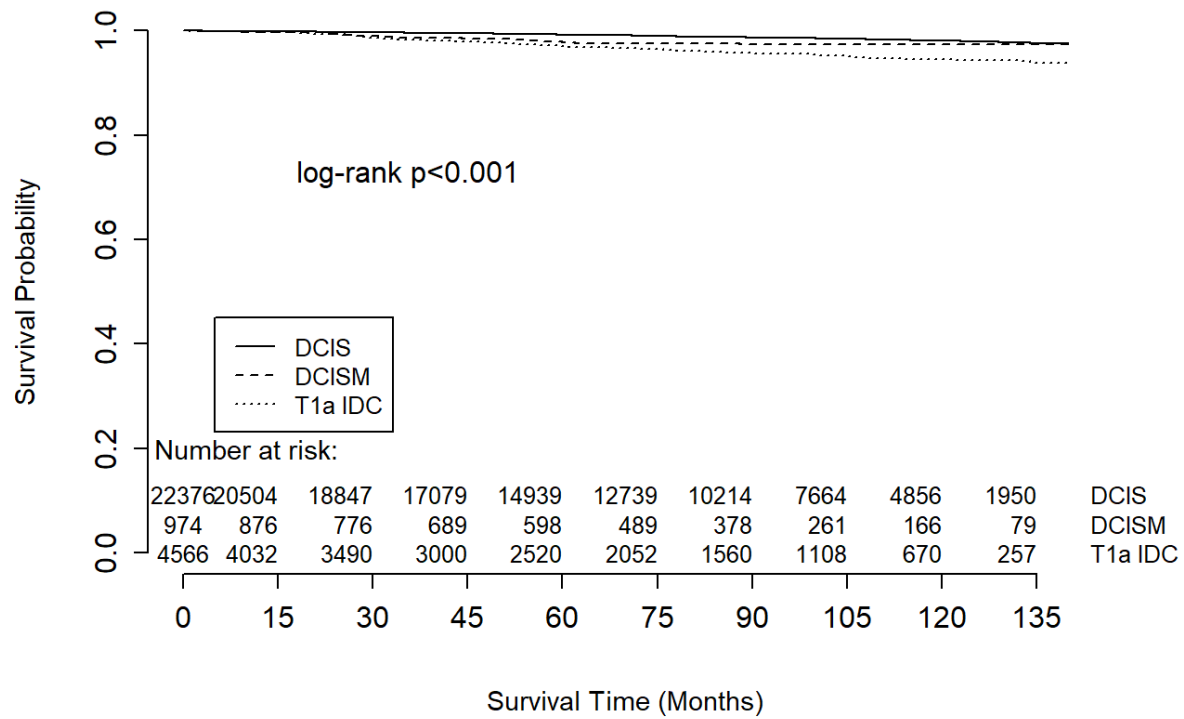

|         | Total | Breast Cancer-Specific Deaths | 5-year Survival (95% CI) | 10-year Survival (95% CI) |
|---------|-------|-------------------------------|--------------------------|---------------------------|
| DCIS    | 22376 | 269                           | 0.99 (0.99, 0.99)        | 0.98 (0.98, 0.98)         |
| DCISM   | 974   | 19                            | 0.98 (0.97, 0.99)        | 0.97 (0.96, 0.99)         |
| T1a IDC | 4566  | 145                           | 0.97 (0.96, 0.98)        | 0.95 (0.94, 0.96)         |
| Total   | 27916 | 433                           | 0.99 (0.99, 0.99)        | 0.98 (0.97, 0.98)         |

(2D)

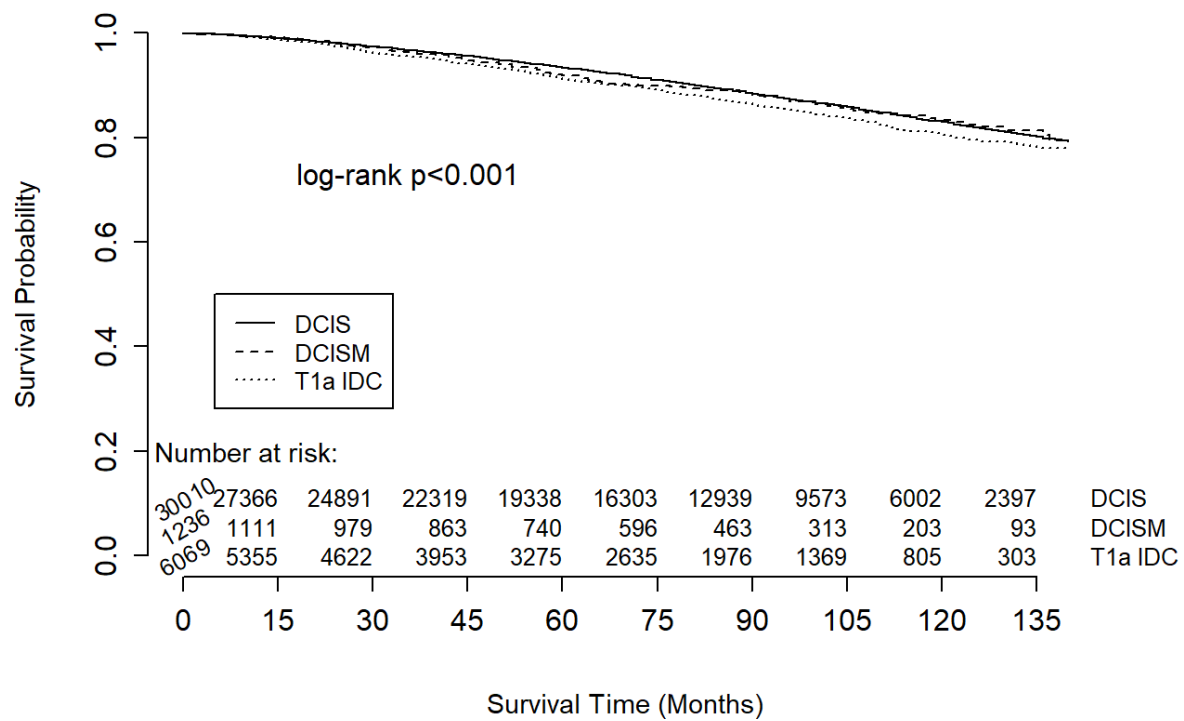

|         | Total | All-Cause Deaths | 5-year Survival (95% CI) | 10-year Survival (95% CI) |
|---------|-------|------------------|--------------------------|---------------------------|
| DCIS    | 30010 | 3274             | 0.93 (0.93, 0.94)        | 0.83 (0.82, 0.84)         |
| DCISM   | 1236  | 127              | 0.92 (0.9, 0.94)         | 0.83 (0.8, 0.86)          |
| T1a IDC | 6069  | 658              | 0.91 (0.9, 0.92)         | 0.81 (0.79, 0.82)         |
| Total   | 37315 | 4059             | 0.93 (0.93, 0.93)        | 0.83 (0.82, 0.83)         |

**Supplemental Figure 3.** Unadjusted survival for women with DCISM or T1a invasive ductal carcinoma stratified by the prognostic cancer stage, as determined by the AJCC Cancer Staging Manual, 8<sup>th</sup> edition, excluding Oncotype DX scores due to data restrictions (SEER database from 2004-2015). **(A)** Cancer-specific survival for prognostic stage IA. **(B)** Overall survival for prognostic stage IA. **(C)** Cancer-specific survival for prognostic stage IB. **(D)** Overall survival for prognostic stage IB. **(E)** Cancer-specific survival for prognostic stage II/III. **(F)** Overall survival for prognostic stage II/III.

**(3A)**

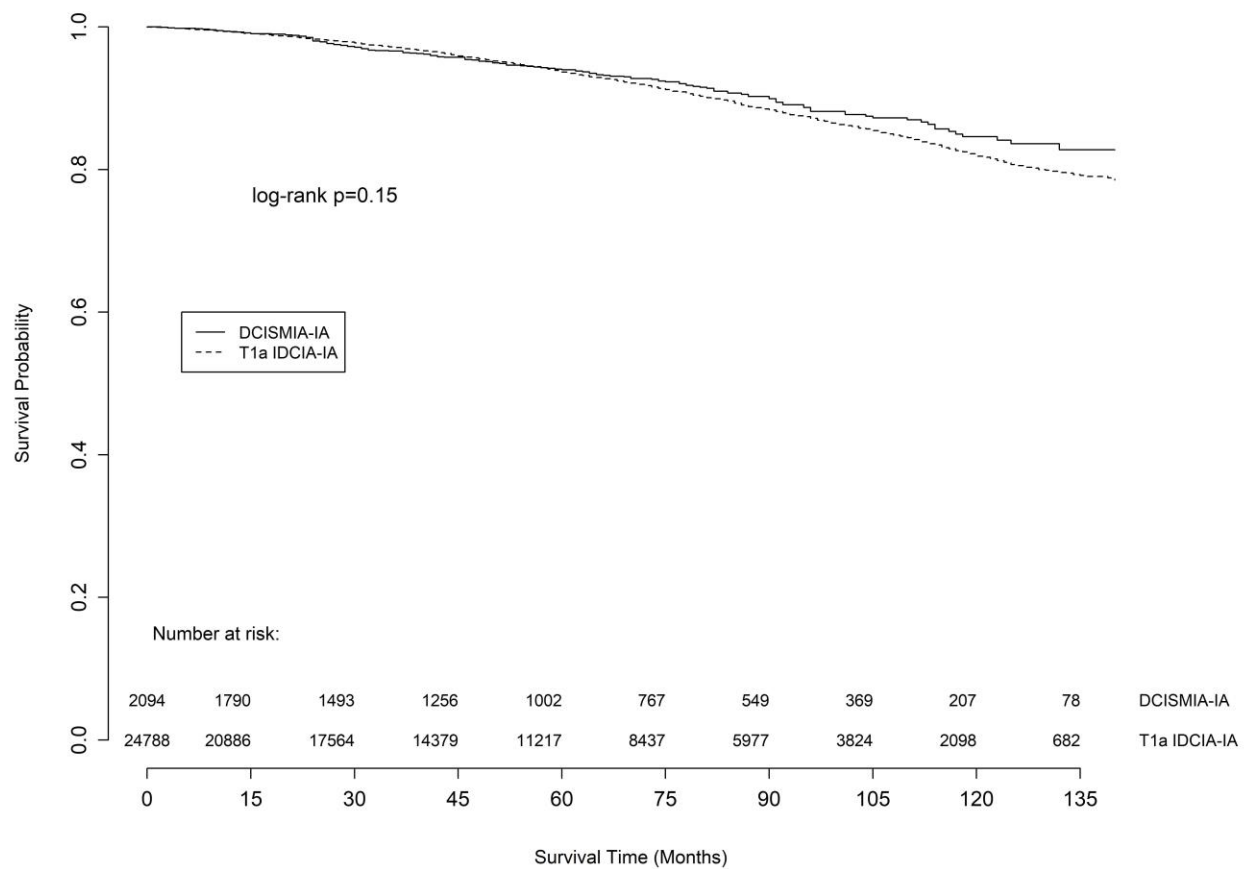

(3B)

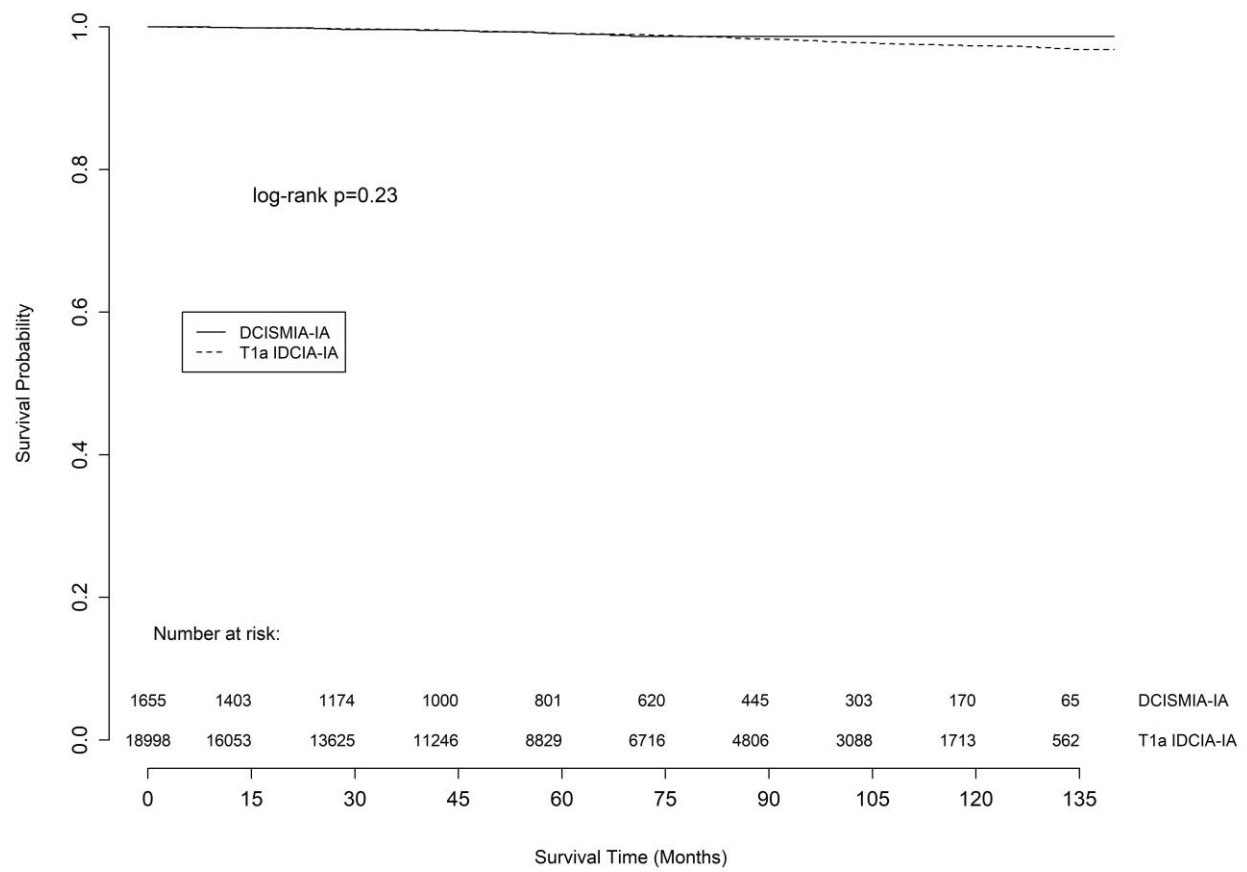

(3C)

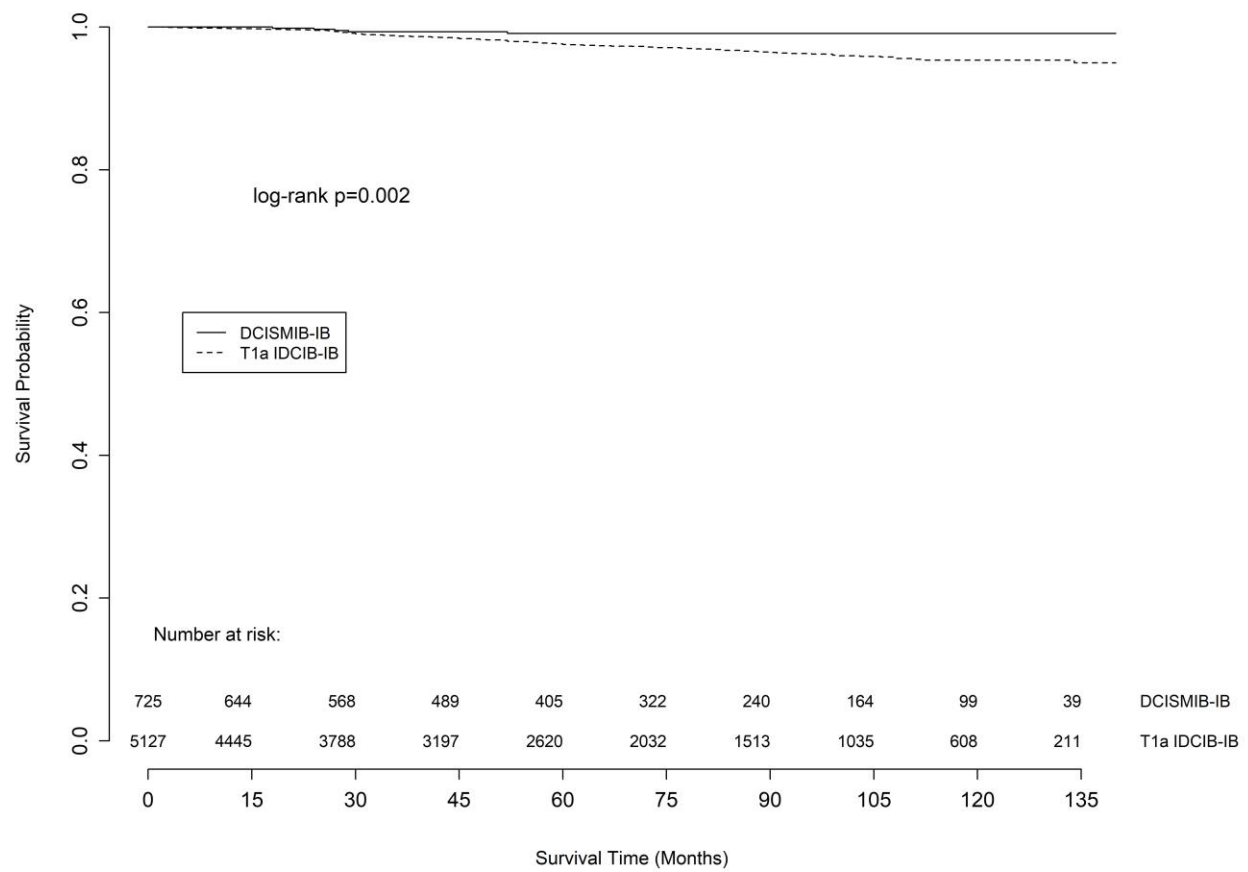

(3D)

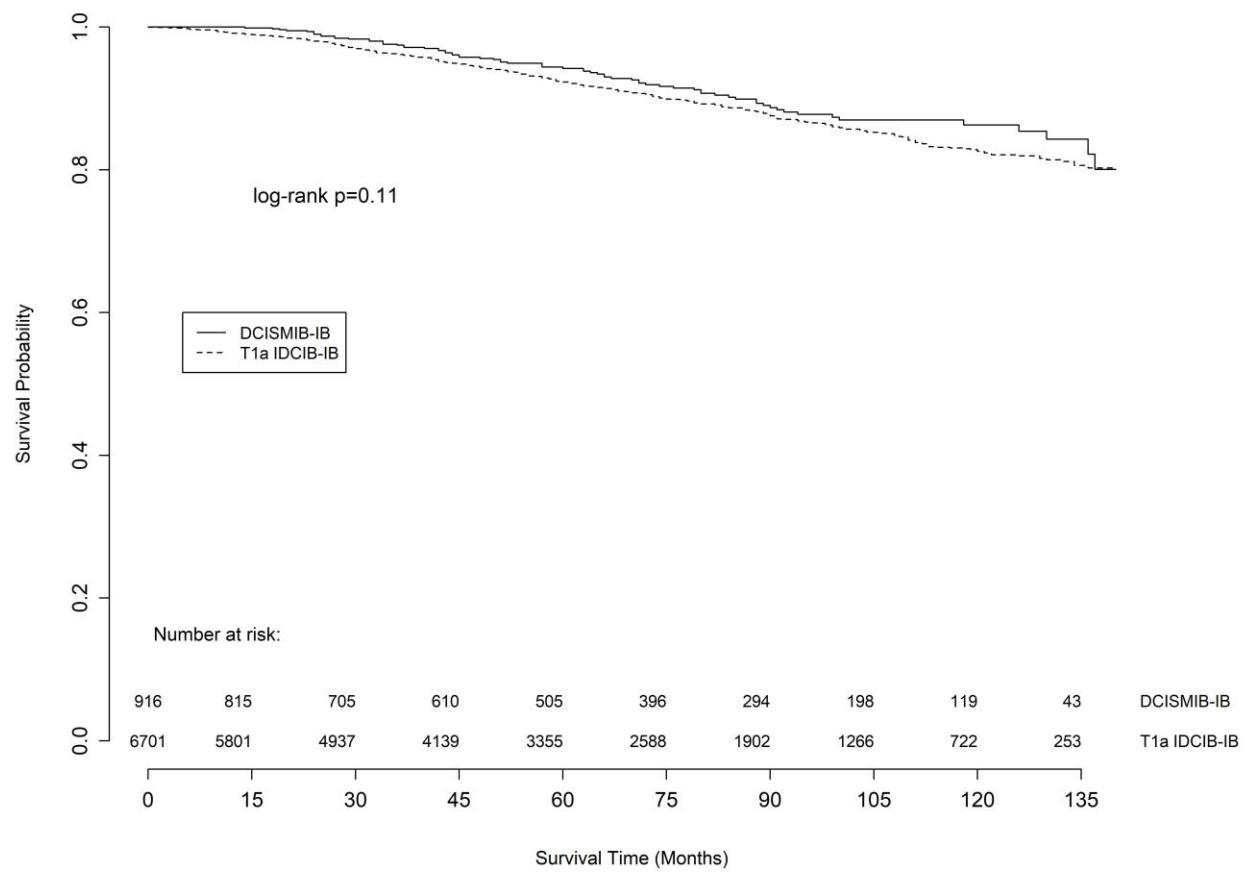

(3E)

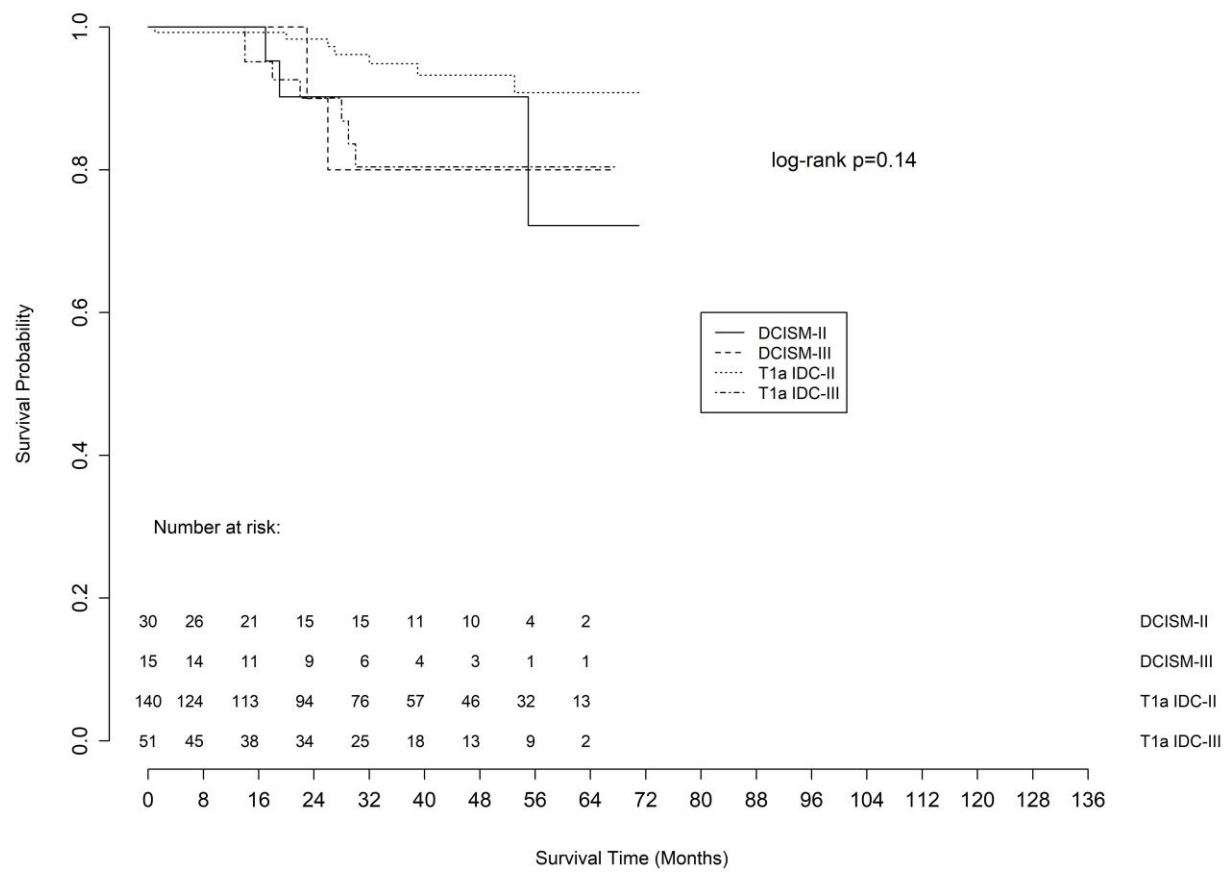

(3F)

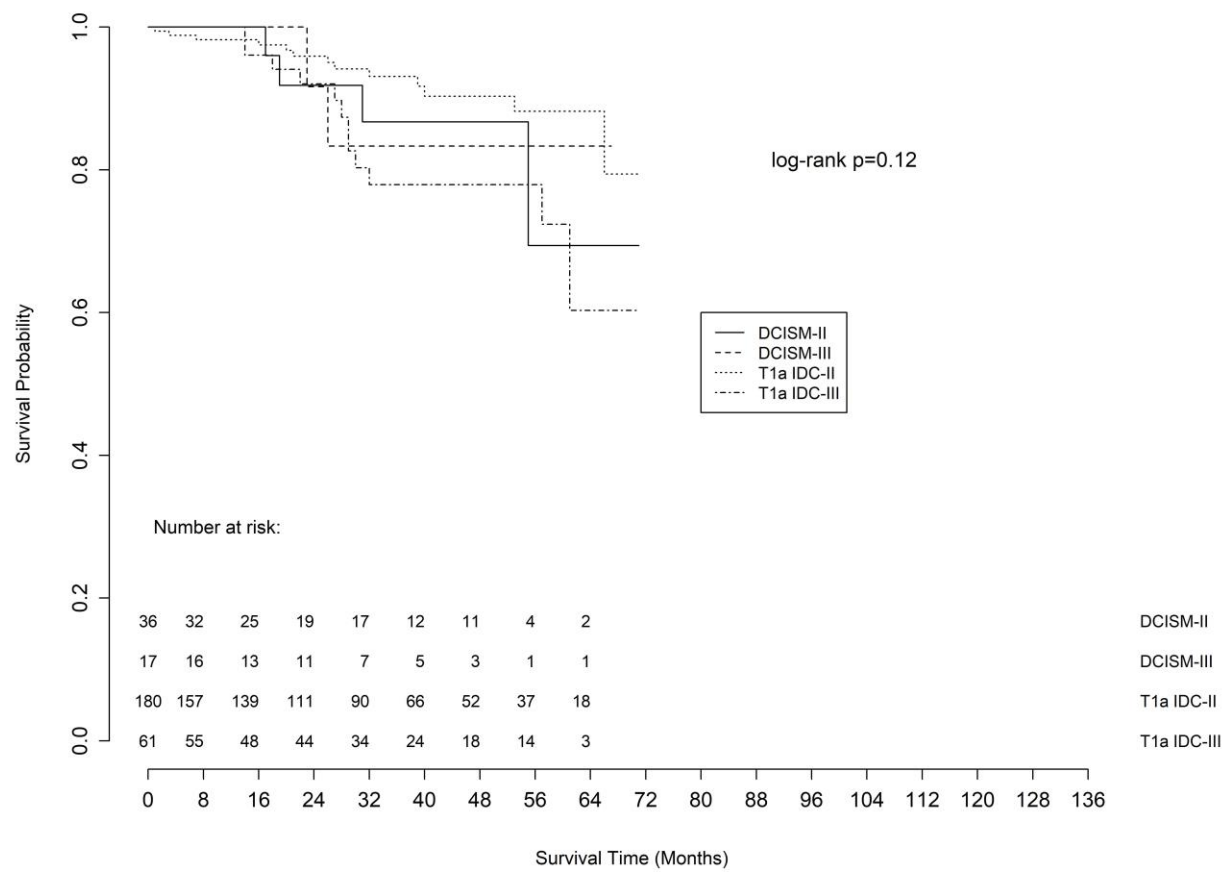

**Supplemental Table 1.** Disease characteristics for select women with breast cancer in the SEER database from 2004-2015, stratified by diagnosis group (DCISM, DCIS, T1a IDC). DCIS: ductal carcinoma in situ. DCISM: DCIS with microinvasion. IDC: invasive ductal carcinoma. ER: estrogen receptor. PR: progesterone receptor. HER2: human-epidermal-growth-factor-receptor-2.

|                          | All Patients              | DCISM                   | DCIS                      | T1a IDC                   | P-Value          |
|--------------------------|---------------------------|-------------------------|---------------------------|---------------------------|------------------|
| <b>If ER reported</b>    | <b>115,181<br/>(100%)</b> | <b>4,084<br/>(3.6%)</b> | <b>77,539<br/>(67.3%)</b> | <b>33,558<br/>(29.1%)</b> | <b>&lt;0.001</b> |
| Positive                 | 96,258 (83.6%)            | 3,087 (75.6%)           | 64,691 (83.4%)            | 28,480 (81.8%)            |                  |
| Negative/Borderline      | 18,923 (16.4%)            | 997 (24.4%)             | 12,848 (16.6%)            | 5,078 (15.1%)             |                  |
| <b>If PR reported</b>    | <b>110,095<br/>(100%)</b> | <b>4,007<br/>(3.6%)</b> | <b>72,807<br/>(66.1%)</b> | <b>33,281<br/>(30.2%)</b> | <b>&lt;0.001</b> |
| Positive                 | 79,606 (72.3%)            | 2,457 (61.3%)           | 53,005 (72.8%)            | 24,144 (72.5%)            |                  |
| Negative/Borderline      | 30,489 (27.7%)            | 1,550 (38.7%)           | 19,802 (27.2%)            | 9,137 (27.5%)             |                  |
| <b>If HER2 reported</b>  | <b>26,247<br/>(100%)</b>  | <b>1,725<br/>(6.6%)</b> | <b>6,339<br/>(24.1%)</b>  | <b>18,183<br/>(69.3%)</b> | <b>&lt;0.001</b> |
| Positive                 | 5,016 (80.9%)             | 456 (26.4%)             | 1,902 (30.0%)             | 2,658 (14.6%)             |                  |
| Negative/Borderline      | 21,231 (19.1%)            | 1,269 (73.6%)           | 4,437 (70.0%)             | 15,525 (85.4%)            |                  |
| <b>If Grade reported</b> | <b>119,489<br/>(100%)</b> | <b>3,333<br/>(2.8%)</b> | <b>82,806<br/>(69.3%)</b> | <b>33,350<br/>(27.9%)</b> | <b>&lt;0.001</b> |
| Grade 1                  | 26,306 (22.0%)            | 938 (28.1%)             | 12,337 (14.9%)            | 13,031 (39.1%)            |                  |
| Grade 2                  | 48,521 (40.6%)            | 1,458 (43.7%)           | 32,617 (39.4%)            | 14,446 (43.3%)            |                  |
| Grade 3                  | 44,662 (37.4%)            | 937 (28.1%)             | 37,852 (45.7%)            | 5,873 (17.6%)             |                  |

**Supplemental Table 2.** Disease characteristics for select women with DCISM in the SEER database from 2004-2015, stratified by patient age. DCISM: ductal carcinoma in situ with microinvasion. LN: lymph nodes. ER: estrogen receptor. PR: progesterone receptor. HER2: human-epidermal-growth-factor-receptor-2.

|                        | All Patients<br>N=4,361<br>(100%) | 18-39y<br>N=160<br>(3.7%) | 40-55y<br>N=1,556<br>(35.7%) | 56-70y<br>N=1,786<br>(40.9%) | >70y<br>N=859<br>(19.7%) | Overall<br>P-Value |
|------------------------|-----------------------------------|---------------------------|------------------------------|------------------------------|--------------------------|--------------------|
| N Stage                |                                   |                           |                              |                              |                          | <0.001             |
| N0                     | 3,920 (89.9%)                     | 128 (80%)                 | 1,383 (88.9%)                | 1,612 (90.3%)                | 797 (92.8%)              |                    |
| N1                     | 328 (7.5%)                        | 29 (18.1%)                | 126 (8.1%)                   | 129 (7.2%)                   | 44 (5.1%)                |                    |
| N2                     | 56 (1.3%)                         | 2 (1.3%)                  | 26 (1.7%)                    | 22 (1.2%)                    | 6 (0.7%)                 |                    |
| N3                     | 36 (0.8%)                         | 1 (0.6%)                  | 14 (0.9%)                    | 14 (0.8%)                    | 7 (0.8%)                 |                    |
| NX                     | 21 (0.5%)                         | 0 (0%)                    | 7 (0.4%)                     | 9 (0.5%)                     | 5 (0.6%)                 |                    |
| Grade                  |                                   |                           |                              |                              |                          | <0.001             |
| 1                      | 938 (21.5%)                       | 22 (13.8%)                | 286 (18.4%)                  | 378 (21.2%)                  | 252 (29.3%)              |                    |
| 2                      | 1,458 (33.4%)                     | 51 (31.9%)                | 505 (32.5%)                  | 620 (34.7%)                  | 282 (32.8%)              |                    |
| 3                      | 937 (21.5%)                       | 48 (30%)                  | 379 (24.4%)                  | 376 (21.1%)                  | 134 (15.6%)              |                    |
| Unknown                | 1,028 (23.6%)                     | 39 (24.4%)                | 386 (24.8%)                  | 412 (23.1%)                  | 191 (22.2%)              |                    |
| ER Status              |                                   |                           |                              |                              |                          | 0.004              |
| Positive               | 3,087 (70.8%)                     | 105 (65.6%)               | 1,073 (69%)                  | 1,266 (70.9%)                | 643 (74.9%)              |                    |
| Negative/Borderline    | 997 (22.9%)                       | 43 (26.9%)                | 383 (24.6%)                  | 418 (23.4%)                  | 153 (17.8%)              |                    |
| Unknown                | 277 (6.4%)                        | 12 (7.5%)                 | 100 (6.4%)                   | 102 (5.7%)                   | 63 (7.3%)                |                    |
| PR Status              |                                   |                           |                              |                              |                          | 0.17               |
| Positive               | 2,457 (56.3%)                     | 85 (53.1%)                | 889 (57.1%)                  | 978 (54.8%)                  | 505 (58.8%)              |                    |
| Negative/Borderline    | 1,550 (35.5%)                     | 61 (38.1%)                | 546 (35.1%)                  | 668 (37.4%)                  | 275 (32%)                |                    |
| Unknown                | 354 (8.1%)                        | 14 (8.8%)                 | 121 (7.8%)                   | 140 (7.8%)                   | 79 (9.2%)                |                    |
| HER2 Status            |                                   |                           |                              |                              |                          | <0.001             |
| Positive               | 456 (10.5%)                       | 15 (9.4%)                 | 215 (13.8%)                  | 178 (10%)                    | 48 (5.6%)                |                    |
| Negative/Borderline    | 1,269 (29.1%)                     | 36 (22.5%)                | 405 (26%)                    | 542 (30.3%)                  | 286 (33.3%)              |                    |
| Unknown                | 512 (11.7%)                       | 24 (15%)                  | 159 (10.2%)                  | 223 (12.5%)                  | 106 (12.3%)              |                    |
| Diagnosed before 2010* | 2,124 (48.7%)                     | 85 (53.1%)                | 777 (49.9%)                  | 843 (47.2%)                  | 419 (48.8%)              |                    |

\*Patients diagnosed before 2010 did not routinely have HER2 status reported in the database.

**Supplemental Table 3.** Disease characteristics for select women with DCISM in the SEER database from 2004-2015, stratified by patient age (18-39y, 40-55y, 56-70y, >70y), excluding those with missing data. DCISM: ductal carcinoma in situ with microinvasion. ER: estrogen receptor. PR: progesterone receptor. HER2: human-epidermal-growth-factor-receptor-2.

|                            | All Patients                  | 18-39y                      | 40-55y                         | 56-70y                         | >70y                         | P-Value |
|----------------------------|-------------------------------|-----------------------------|--------------------------------|--------------------------------|------------------------------|---------|
| <b>Grade (if reported)</b> | <b>3,333</b><br><b>(100%)</b> | <b>121</b><br><b>(3.6%)</b> | <b>1170</b><br><b>(35.1%)</b>  | <b>1,374</b><br><b>(41.2%)</b> | <b>668</b><br><b>(20.0%)</b> | <0.001  |
| 1                          | 938 (28.1%)                   | 22 (18.2%)                  | 286 (24.4%)                    | 378 (27.5%)                    | 252 (37.7%)                  |         |
| 2                          | 1,458 (43.7%)                 | 51 (42.1%)                  | 505 (43.2%)                    | 620 (45.1%)                    | 282 (42.2%)                  |         |
| 3                          | 937 (28.1%)                   | 48 (39.7%)                  | 379 (32.4%)                    | 376 (27.4%)                    | 134 (20.1%)                  |         |
| <b>ER (if reported)</b>    | <b>4,084</b><br><b>(100%)</b> | <b>148</b><br><b>(3.6%)</b> | <b>1,456</b><br><b>(35.6%)</b> | <b>1,684</b><br><b>(41.2%)</b> | <b>796</b><br><b>(19.5%)</b> | 0.001   |
| Positive                   | 3,087 (75.6%)                 | 105 (70.9%)                 | 1,073 (73.7%)                  | 1,266 (75.2%)                  | 643 (80.8%)                  |         |
| Negative/Borderline        | 997 (24.4%)                   | 43 (29.0%)                  | 383 (26.3%)                    | 418 (24.8%)                    | 153 (19.2%)                  |         |
| <b>PR (if reported)</b>    | <b>4,007</b><br><b>(100%)</b> | <b>146</b><br><b>(3.6%)</b> | <b>1,435</b><br><b>(35.8%)</b> | <b>1,646</b><br><b>(41.1%)</b> | <b>780</b><br><b>(19.5%)</b> | 0.07    |
| Positive                   | 2,457 (61.3%)                 | 85 (58.2%)                  | 889 (61.9%)                    | 978 (59.4%)                    | 505 (64.7%)                  |         |
| Negative/Borderline        | 1,550 (38.7%)                 | 61 (41.8%)                  | 546 (38.0%)                    | 668 (40.6%)                    | 275 (35.3%)                  |         |
| <b>HER2 (if reported)</b>  | <b>1,735</b><br><b>(100%)</b> | <b>51</b><br><b>(3.0%)</b>  | <b>620</b><br><b>(35.9%)</b>   | <b>720</b><br><b>(41.7%)</b>   | <b>334</b><br><b>(19.4%)</b> | <0.001  |
| Positive                   | 456 (26.4%)                   | 15 (29.4%)                  | 215 (34.7%)                    | 178 (24.7%)                    | 48 (14.4%)                   |         |
| Negative/Borderline        | 1,269 (73.6%)                 | 36 (70.6%)                  | 405 (65.3%)                    | 542 (75.3%)                    | 286 (85.6%)                  |         |

**Supplemental Table 4.** Comparison of unadjusted 5- and 10-year survival for women with DCISM and T1a invasive ductal carcinoma stratified by the prognostic cancer stage, as determined by the AJCC Cancer Staging Manual, 8<sup>th</sup> edition, excluding Oncotype DX scores due to data restrictions (SEER database from 2004-2015).

|                                 | DCISM              | T1a IDC           | DCISM             | T1a IDC           |
|---------------------------------|--------------------|-------------------|-------------------|-------------------|
| <i>Cancer-specific Survival</i> | <i>5 years</i>     | <i>5 years</i>    | <i>10 years</i>   | <i>10 years</i>   |
| Stage IA                        | 0.99 (0.99,1)      | 0.99 (0.99, 0.99) | 0.99 (0.98, 0.99) | 0.97 (0.97, 0.98) |
| Stage IB                        | 0.99 (0.98 , 1)    | 0.98 (0.97, 0.98) | 0.99 (0.98, 1)    | 0.95 (0.94, 0.96) |
| Stage II                        | 0.72 (0.46 , 1)    | 0.91 (0.84, 0.98) | NE                | NE                |
| Stage III                       | 0.80 (0.59 , 1)    | 0.80 (0.68, 0.95) | NE                | NE                |
| <i>Overall Survival</i>         | <i>5 years</i>     | <i>5 years</i>    | <i>10 years</i>   | <i>10 years</i>   |
| Stage IA                        | 0.94 (0.93 , 0.95) | 0.94 (0.93, 0.94) | 0.85 (0.82,0.87)  | 0.82 (0.81, 0.83) |
| Stage IB                        | 0.94 (0.92 , 0.96) | 0.92 (0.92, 0.93) | 0.86 (0.83,0.90)  | 0.83 (0.81, 0.84) |
| Stage II                        | 0.69 (0.43 , 1)    | 0.88 (0.82, 0.95) | NE                | NE                |
| Stage III                       | 0.83 (0.65 , 1)    | 0.72 (0.58, 0.9)  | NE                | NE                |
